# Supplementary material
Source: publisher figshare collection journal article supplement (https://asha.figshare.com/articles/dataset/_/21760469)
Supplement: Supplementary file 1 [file 2]

**Supplemental Material S4.** Results for multivariate analysis of variance (MANOVA) in English with speaker group (children and adults) as independent variables and vowel duration, whole word duration, and proportion as dependent variables.

| Word  | Transcription | <i>df</i> | <i>f</i> -value | <i>p</i> -value | $\eta_p^2$ |
|-------|---------------|-----------|-----------------|-----------------|------------|
| Pig   | [pig]         | 3, 75     | 3.99            | .011 *          | .138       |
|       | [piqə]        | 3, 47     | 9.89            | < .001 *        | .387       |
| Teeth | [tit]         | 3, 76     | 4.78            | .004 *          | .159       |
| Ball  | [bal]         | 3, 60     | 0.29            | .831            | .014       |
|       | [baɪ]         | 3, 44     | 0.22            | .879            | .015       |
| Moon  | [mun]         | 3, 109    | 0.56            | .640            | .015       |
| Knife | [naɪf]        | 3, 124    | 2.16            | .096            | .050       |
| Fish  | [fiʃ]         | 3, 112    | 5.68            | .001 *          | .132       |
| Van   | [van]         | 3, 91     | 2.06            | .111            | .064       |
| Thumb | [tɒm]         | 3, 42     | 1.41            | .253            | .092       |
|       | [θɒm]         | 3, 31     | .687            | .567            | .062       |
| This  | [ðɪs]         | 3, 65     | 5.93            | .001 *          | .215       |
|       | [dis]         | 3, 56     | 13.25           | < .001 *        | .415       |
| Socks | [saks]        | 3, 52     | 3.43            | .024 *          | .165       |
|       | [sɒks]        | 3, 51     | .376            | .016 *          | .181       |
| Sheep | [ʃip]         | 3, 93     | 1.22            | .306            | .038       |
| Jam   | [dʒam]        | 3, 82     | 3.45            | .020 *          | .112       |
| Legs  | [legz]        | 3, 50     | 1.72            | .174            | .094       |
| Watch | [watʃ]        | 3, 112    | 1.73            | .166            | .044       |
| House | [haʊs]        | 3, 66     | 1.25            | .297            | .054       |
| Five  | [faɪv]        | 3, 112    | .782            | .506            | .021       |
| Foot  | [fɒt]         | 3, 88     | .852            | .469            | .028       |

Note.  $\eta_p^2$  = partial eta-squared, *df* = degrees of freedom.

\* *p* < .05.
