# Supplementary material
Source: publisher figshare collection journal article supplement (https://asha.figshare.com/articles/dataset/_/21760469)
Supplement: Supplementary file 2 [file 2]

# Supplemental Material S1. Highest response variations in JC and English.

| Stimulus Word | JC            |                       | English       |                       |
|---------------|---------------|-----------------------|---------------|-----------------------|
|               | Variation (s) | <i>n</i> (Frequency%) | Variation (s) | <i>n</i> (Frequency%) |
| Pig           | [pɪg]         | 67 (55.8)             | [pɪg]         | 74 (61.7)             |
|               | [pɪgə]        | 41 (34.2)             | [pɪgə]        | 39 (32.50)            |
| Bird          | [bɜːɪd]       | 102 (85.8)            | [bɜːɪd]       | 99 (82.5)             |
| Teeth         | [tit]         | 73 (60.8)             | [tit]         | 67 (55.8)             |
| Door          | [dʊɔɪ]        | 77 (64.2)             | [dʊɔɪ]        | 66 (55.2)             |
|               | [doɪ]         | 36 (30.0)             | [doɪ]         | 46 (38.3)             |
| Car           | [kaɪ]         | 108 (90.0)            | [kaɪ]         | 110 (91.7)            |
| Girl          | [gɜːɪl]       | 103 (85.8)            | [gɜːɪl]       | 104 (86.7)            |
| Boy           | [bɔɪ]         | 104 (86.7)            | [bɔɪ]         | 107 (89.2)            |
| Television    | [tɪvɪ]        | 87 (72.5)             | [tɪvɪ]        | 87 (72.5)             |
| Ball          | [bal]         | 53 (44.2)             | [bal]         | 51 (42.5)             |
|               | [bəl]         | 44 (36.7)             | [bəl]         | 36 (30.0)             |
| Moon          | [mun]         | 99 (82.5)             | [mun]         | 102 (85.0)            |
| Knife         | [naɪf]        | 115 (95.8)            | [naɪf]        | 115 (95.8)            |
| Fish          | [fɪʃ]         | 90 (75.0)             | [fɪʃ]         | 105 (87.5)            |
| Van           | [van]         | 98 (81.7)             | [van]         | 85 (70.8)             |
|               | [təm]         | 43 (35.8)             | [təm]         | 33 (27.5)             |
| Thumb         | —             | —                     | [θəm]         | 27 (22.5)             |
| This          | [ðɪs]         | 24 (20.2)             | [ðɪs]         | 61 (50.8)             |
|               | [dɪs]         | 77 (64.2)             | [dɪs]         | 50 (41.7)             |
| Socks         | [saks]        | 48 (40.0)             | [saks]        | 45 (37.5)             |
|               | [sɒks]        | 44 (36.7)             | [sɒks]        | 43 (35.8)             |
| Sheep         | [ʃɪp]         | 80 (66.7)             | [ʃɪp]         | 76 (71.7)             |
| Jam           | [dʒam]        | 78 (65.5)             | [dʒam]        | 75 (62.5)             |
| Legs          | [lɛg]         | 35 (29.2)             | [lɛgz]        | 48 (40)               |
|               | [lɛgz]        | 27 (22.5)             | —             | —                     |
| Watch         | [wɒtʃ]        | 105 (87.5)            | [wɒtʃ]        | 100 (83.3)            |
| House         | [haʊs]        | 50 (41.7)             | [haʊs]        | 60 (50.0)             |
| Five          | [faɪv]        | 99 (82.5)             | [faɪv]        | 108 (90.0)            |
| Foot          | [fʊt]         | 80 (66.7)             | [fʊt]         | 85 (70.8)             |
