# Supplementary material
Source: publisher figshare collection journal article supplement (https://asha.figshare.com/articles/dataset/_/21760469)
Supplement: Supplementary file 3 [file 2]

**Supplemental Material S2.** Results for multivariate analysis of variance (MANOVA) in JC with speaker group (children and adults) as independent variables and vowel duration, whole word duration, and proportion as dependent variables.

| Word  | Transcription | <i>df</i> | <i>f</i> -value | <i>p</i> -value | $\eta_p^2$ |
|-------|---------------|-----------|-----------------|-----------------|------------|
| Pig   | [pɪgə]        | 3, 49     | 15.71           | .000 *          | .490       |
| Teeth | [tit]         | 3, 83     | 6.40            | .001 *          | .188       |
| Ball  | [bal]         | 2, 58     | .174            | .540            | .006       |
|       | [bəl]         | 3, 53     | .446            | .721            | .025       |
| Moon  | [mun]         | 3, 102    | 1.042           | .377            | .030       |
| Knife | [naɪf]        | 2, 123    | 1.035           | .358            | .017       |
| Fish  | [fɪʃ]         | 3, 95     | 2.79            | .045 *          | .081       |
| Van   | [Van]         | 3, 101    | 2.035           | .114            | .057       |
| Thumb | [təm]         | 3, 51     | 4.94            | .004 *          | .225       |
| This  | [dis]         | 3, 74     | 12.34           | .000 *          | .334       |
| Socks | [saks]        | 3, 53     | 2.410           | .077            | .120       |
|       | [sɒks]        | 3, 52     | 6.44            | .001 *          | .271       |
| Sheep | [ʃɪp]         | 3, 87     | 2.112           | .104            | .068       |
| Jam   | [dʒam]        | 3, 86     | 1.92            | .113            | .063       |
| Legs  | [lɛg]         | 3, 35     | 2.210           | .104            | .159       |
|       | [lɛgz]        | 3, 31     | 3.49            | .027 *          | .252       |
| Watch | [watʃ]        | 3, 113    | 2.749           | .046 *          | .068       |
| House | [haʊs]        | 3, 56     | 2.94            | .041 *          | .136       |
| Five  | [faɪv]        | 3, 102    | 1.199           | .314            | .034       |
| Foot  | [fɒt]         | 3, 83     | 1.928           | .131            | .065       |

Note.  $\eta_p^2$  = partial eta-squared, *df* = degrees of freedom.

\* *p* < .05.
