# Supplementary material
Source: publisher figshare collection journal article supplement (https://asha.figshare.com/articles/dataset/_/21760469)
Supplement: Supplementary file 4 [file 2]

**Supplemental Material S3.** Univariate ANOVAs results in JC for all interaction effects (seconds) as post hoc analyses.

|       |        | Whole word duration |                 |                 |                          | Vowel duration  |                 |                          |                 | Proportion duration |                          |  |  |
|-------|--------|---------------------|-----------------|-----------------|--------------------------|-----------------|-----------------|--------------------------|-----------------|---------------------|--------------------------|--|--|
| Word  |        | <i>df</i>           | <i>f</i> -value | <i>p</i> -value | <i>M</i> (sec)           | <i>f</i> -value | <i>p</i> -value | <i>M</i> (sec)           | <i>f</i> -value | <i>p</i> -value     | <i>M</i> (sec)           |  |  |
| Pig   | [pɪgə] | 1, 51               | 17.27           | < .001 *        | Child .551<br>Adult .391 | 40.12           | < .001 *        | Child .249<br>Adult .140 | 11.05           | .002 *              | Child .459<br>Adult .363 |  |  |
| Teeth | [tit]  | 1, 85               | 19.53           | < .001 *        | Child .635<br>Adult .413 | 7.28            | .008 *          | Child .319<br>Adult .227 | 0.590           | .444                | Child .508<br>Adult .538 |  |  |
| Fish  | [fiʃ]  | 1, 97               | 1.58            | .211            | Child .687<br>Adult .612 | 6.11            | .015 *          | Child .199<br>Adult .125 | 1.65            | .202                | Child .312<br>Adult .211 |  |  |
| Thumb | [təm]  | 1, 53               | 0.857           | .359            | Child .488<br>Adult .451 | 10.53           | .002 *          | Child .241<br>Adult .181 | 11.85           | .001 *              | Child .495<br>Adult .393 |  |  |
| This  | [dis]  | 1, 76               | 9.33            | .003 *          | Child .441<br>Adult .635 | 0.724           | .398            | Child .157<br>Adult .137 | 17.14           | < .001 *            | Child .369<br>Adult .215 |  |  |
| Socks | [sɒks] | 1, 54               | 9.73            | .003 *          | Child .911<br>Adult .760 | 8.60            | .005 *          | Child .204<br>Adult .151 | 1.24            | .270                | Child .234<br>Adult .202 |  |  |
| Legs  | [lɛgz] | 1, 33               | 7.73            | .009 *          | Child .849<br>Adult .671 | 7.45            | .010 *          | Child .257<br>Adult .178 | 2.12            | .155                | Child .303<br>Adult .265 |  |  |
| Watch | [watʃ] | 1, 115              | 4.18            | .043            | Child .745<br>Adult .641 | 5.50            | .021            | Child .198<br>Adult .143 | 2.05            | .155                | Child .274<br>Adult .225 |  |  |
| House | [haʊs] | 1, 48               | 6.75            | .012 *          | Child .826<br>Adult .665 | 6.57            | .013 *          | Child .358<br>Adult .271 | 0.637           | .428                | Child .440<br>Adult .412 |  |  |

*Note.* *df* = degrees of freedom, *M* = mean.

\*  $p < .016$ . \*\*  $p < .05$ .
