# Supplementary material
Source: publisher figshare collection journal article supplement (https://asha.figshare.com/articles/dataset/_/21760469)
Supplement: Supplementary file 5 [file 2]

**Supplemental Material S5.** Univariate ANOVAs results in English for all interaction effects (seconds) as post hoc analyses.

| Word<br>[transcription] |        | Whole word duration |                 |                 |                | Vowel duration |                 |                 |                | Proportion duration |                 |                 |                |      |
|-------------------------|--------|---------------------|-----------------|-----------------|----------------|----------------|-----------------|-----------------|----------------|---------------------|-----------------|-----------------|----------------|------|
|                         |        | <i>df</i>           | <i>f</i> -value | <i>p</i> -value | <i>M</i> (sec) |                | <i>f</i> -value | <i>p</i> -value | <i>M</i> (sec) |                     | <i>f</i> -value | <i>p</i> -value | <i>M</i> (sec) |      |
| Pig                     | [pɪg]  | 1, 77               | 8.76            | .004 *          | Child          | .452           | 6.34            | .014 *          | Child          | .244                | 0.66            | .419            | Child          | .539 |
|                         |        |                     |                 |                 | Adult          | .294           |                 |                 | Adult          | .151                |                 |                 | Adult          | .498 |
|                         | [pɪgə] | 1, 49               | 8.21            | .006 *          | Child          | .580           | 17.50           | < .001 *        | Child          | .254                | 6.57            | .013 *          | Child          | .463 |
|                         |        |                     |                 |                 | Adult          | .391           |                 |                 | Adult          | .140                |                 |                 | Adult          | .363 |
| Teeth                   | [tit]  | 1, 78               | 14.16           | < .001 *        | Child          | .630           | 6.83            | .011 *          | Child          | .316                | 0.682           | .411            | Child          | .506 |
|                         |        |                     |                 |                 | Adult          | .413           |                 |                 | Adult          | .227                |                 |                 | Adult          | .538 |
| Fish                    | [fɪʃ]  | 1, 114              | 1.77            | .187            | Child          | .698           | 11.89           | .001 *          | Child          | .198                | 8.77            | .004 *          | Child          | .298 |
|                         |        |                     |                 |                 | Adult          | .612           |                 |                 | Adult          | .125                |                 |                 | Adult          | .211 |
| This                    | [ðɪs]  | 1, 67               | 6.89            | .011 *          | Child          | .426           | 0.107           | .745            | Child          | .146                | 16.17           | < .001 *        | Child          | .110 |
|                         |        |                     |                 |                 | Adult          | .588           |                 |                 | Adult          | .139                |                 |                 | Adult          | .240 |
|                         | [dɪs]  | 1, 58               | 29.80           | < .001 *        | Child          | .337           | 2.79            | .101            | Child          | .109                | 11.89           | .001 *          | Child          | .340 |
|                         |        |                     |                 |                 | Adult          | .635           |                 |                 | Adult          | .137                |                 |                 | Adult          | .215 |
| Socks                   | [saks] | 1, 54               | 0.629           | .431            | Child          | .861           | 7.13            | .010 *          | Child          | .209                | 5.66            | .021 **         | Child          | .260 |
|                         |        |                     |                 |                 | Adult          | .794           |                 |                 | Adult          | .136                |                 |                 | Adult          | .172 |
|                         | [sɒks] | 1, 53               | 5.41            | .024 **         | Child          | .905           | 8.47            | .005 *          | Child          | .198                | 1.51            | .028 **         | Child          | .226 |
|                         |        |                     |                 |                 | Adult          | .760           |                 |                 | Adult          | .151                |                 |                 | Adult          | .202 |
| Jam                     | [dʒam] | 1, 84               | 2.40            | .125            | Child          | .574           | 4.10            | .046 **         | Child          | .272                | 4.61            | .035 **         | Child          | .472 |
|                         |        |                     |                 |                 | Adult          | .489           |                 |                 | Adult          | .197                |                 |                 | Adult          | .403 |

Note. *Df* = degrees of freedom, *M* = mean.

\*  $p < .016$ , \*\*  $p < .05$ .
